# Supplementary material for: <em>Streptococcus pneumoniae</em> and Influenza (H1N1) virus Genome Study Against Human Genome Sequences – Blastn and DAVID Analysis
Source: Preprints.org preprint supplement (doi:10.20944/preprints202308.0171.v1), 2023-08-02

**Supplement Figure 1.** Streptococcus pneumoniae Vs Homo sapiens overlapping genes functional analysis, BIOGRID interactions by DAVID.

[illegible]

Supplement figure 2. Curated pathways by NDEx of genes concerning Influenza virus genome Vs Homo sapiens.

## Curated Pathways - Similarity

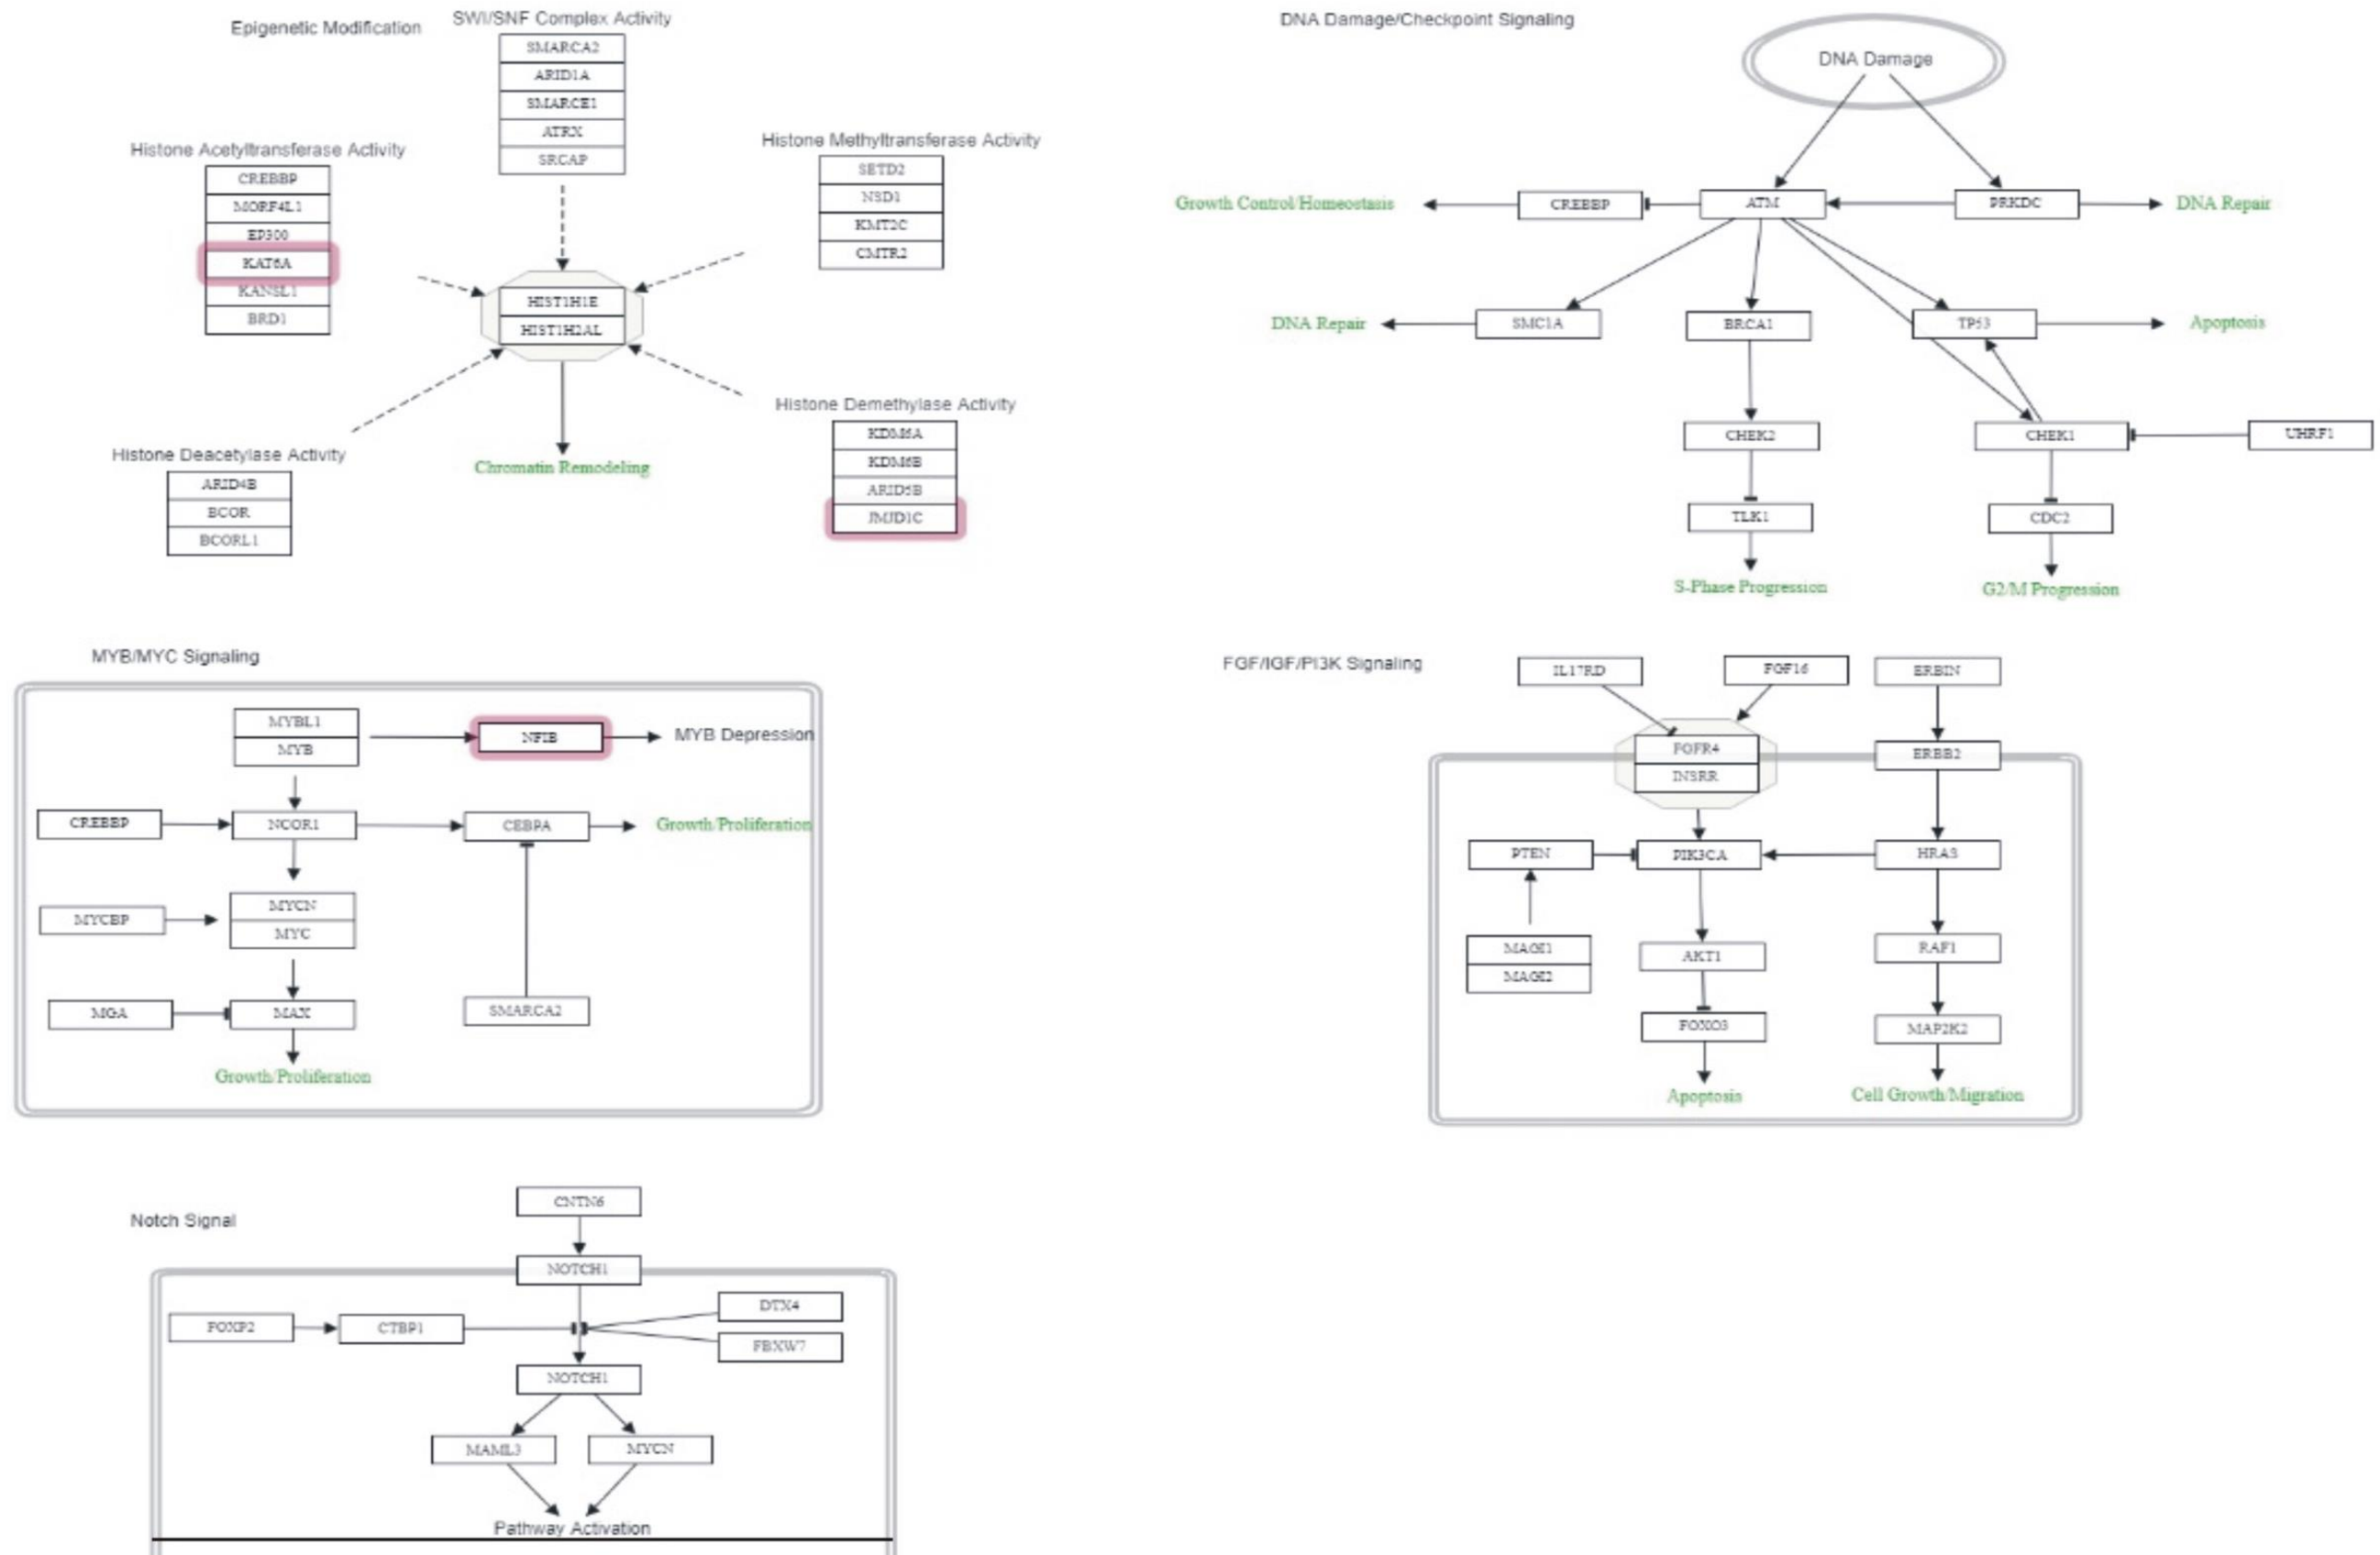

Supplement figure 3. Curated pathways by NDEx of genes concerning Streptococcus pneumoniae Vs Homo sapiens.

## Curated Pathways - Similarity

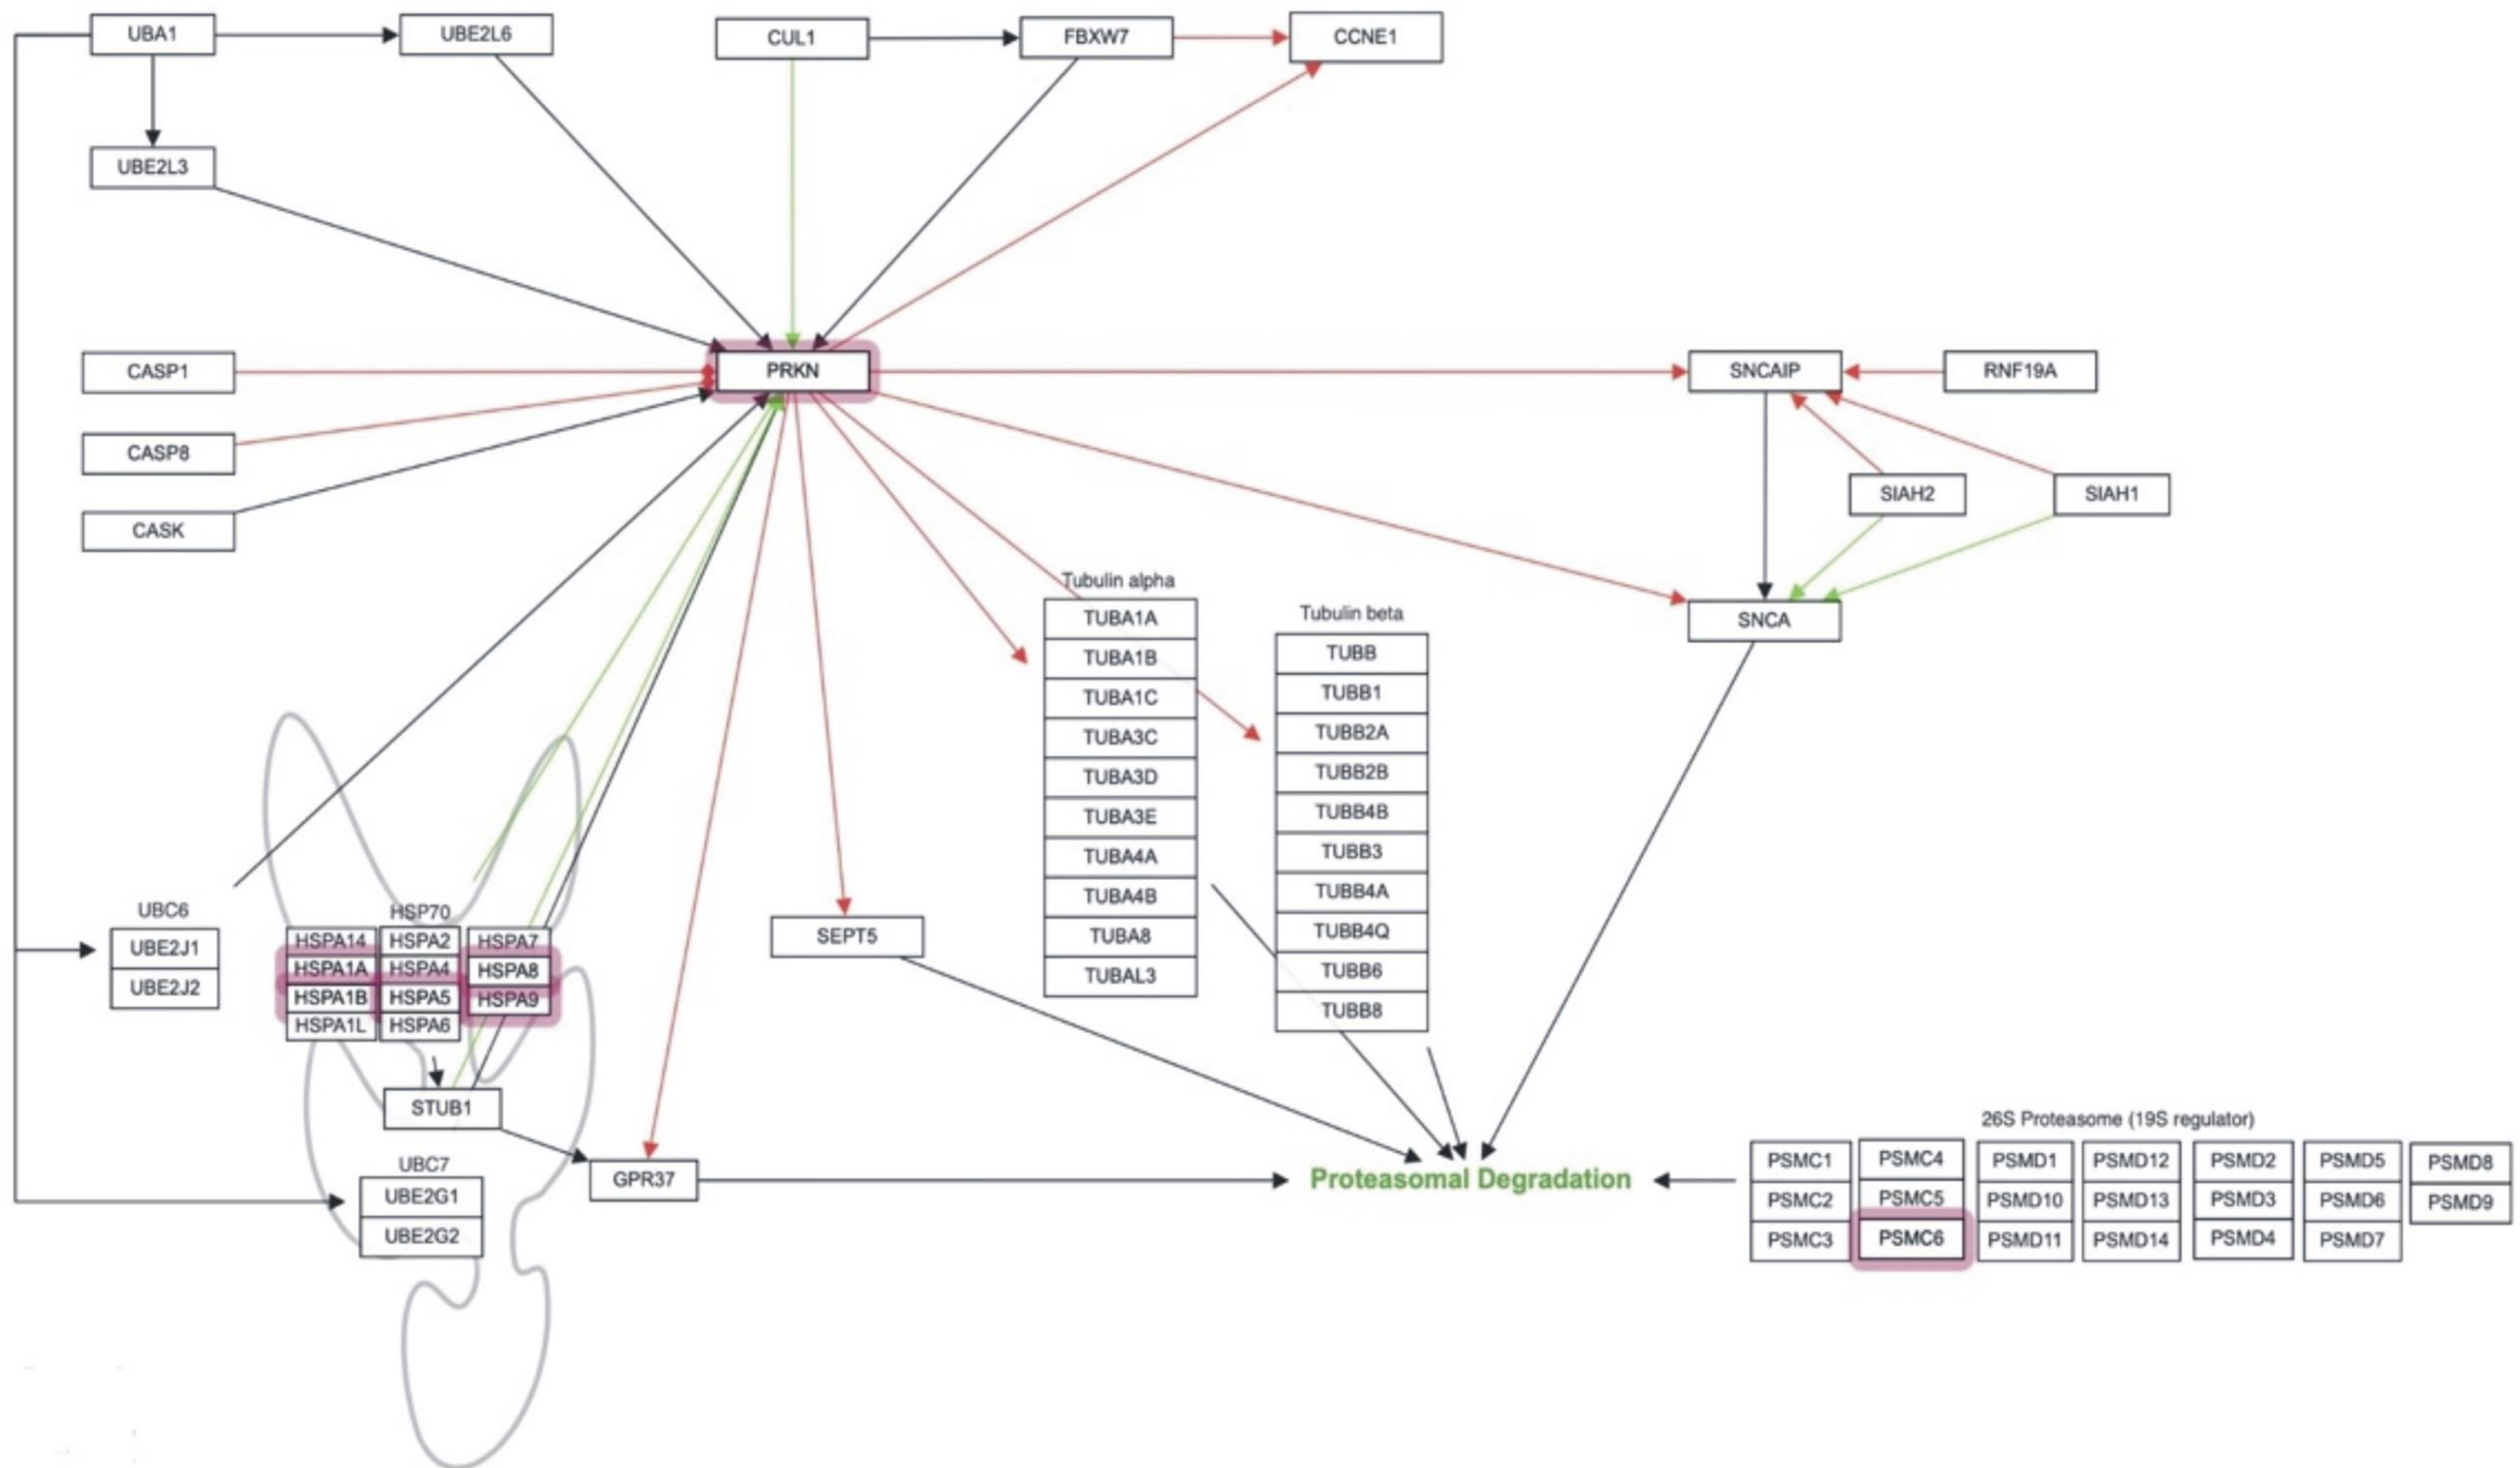



Supplement figure 4. Influenza H1N1 Vs. Homo sapiens, overlapping gene analysis by NDEx . Panel A shows pathways and similarity and Panel B INDRO GO similarity.

## A Pathway figures Similarity

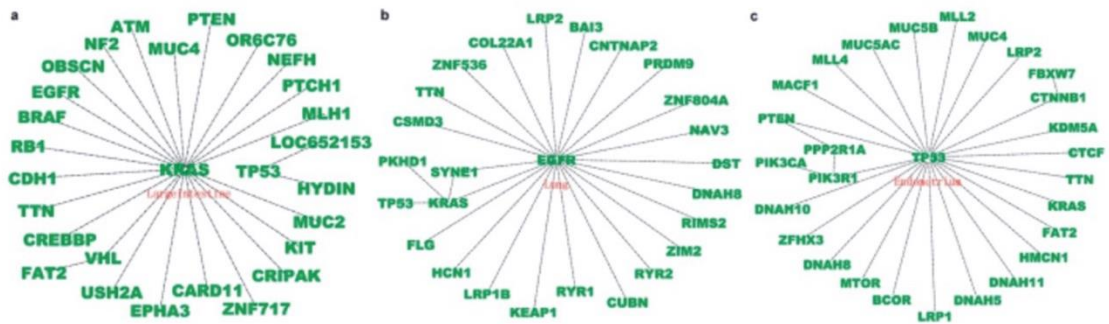

## B INDRA GO Similarity

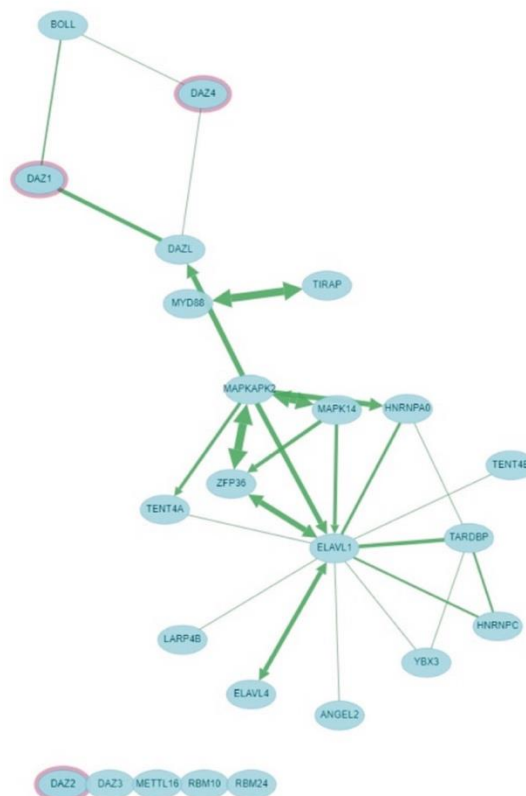

**Supplement figure 5 Streptococcus pneumoniae Vs. Homo sapiens, overlapping gene analysis by NDEx. Panel A shows Pathways and similarity and Panel B shows Pathway figures overlap.**

## A Pathway figures Similarity

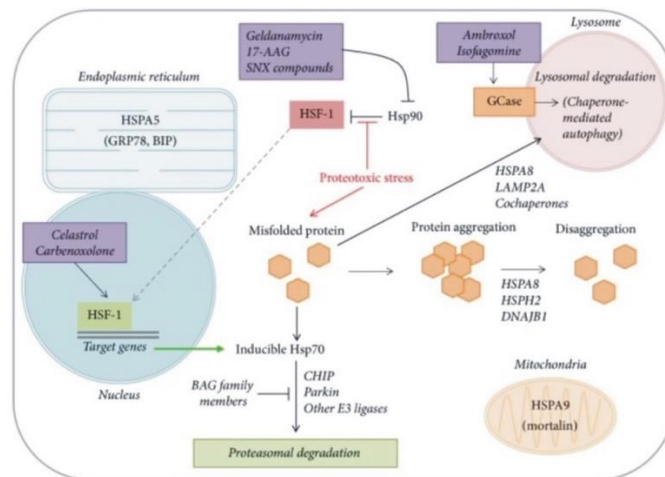

## B Pathway Figures Overlap

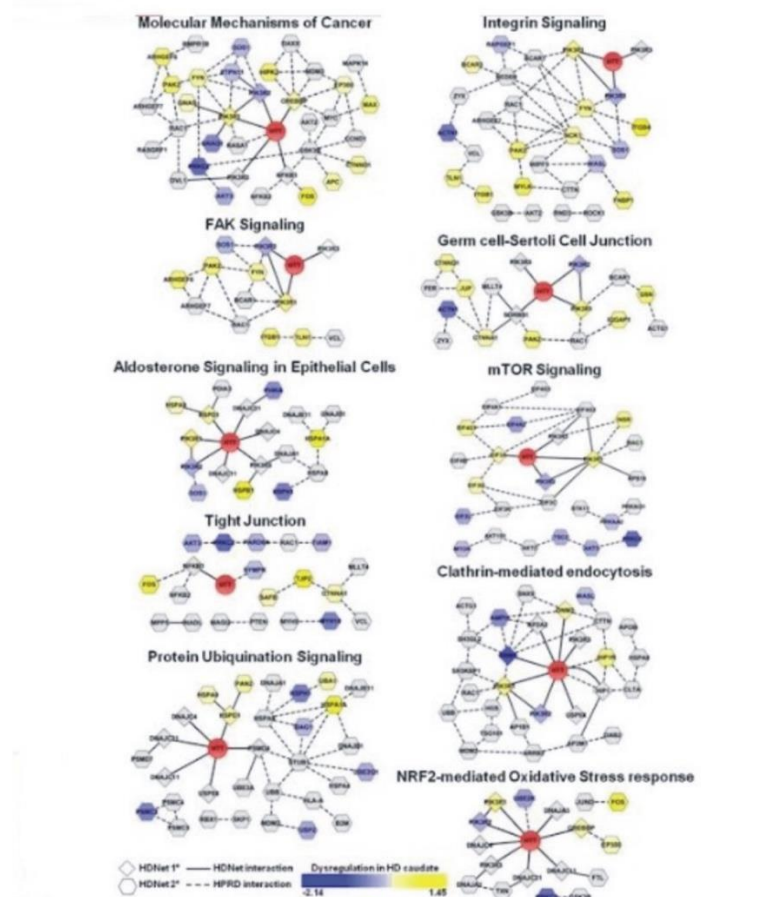

Supplement: Supplementary file 1 [file supplementary]
